1  
2  
3  
4  
5  
6  
7  
8  
9  
10  
11  
12  
13  
14  
15  
16  
17  
18  
19  
20  
21  
22  
23  
24  
25  
26  
27  
28  
29  
30  
31  
32  
33  
34  
35  
36  
37  
38  
39  
40  
41  
42  
43  
44  
45  
46  
47  
48  
49  
50

# Humans optimally anticipate and compensate for an uneven step during walking

Osman Darici<sup>1,2\*</sup>, Arthur D. Kuo<sup>1</sup>

<sup>1</sup>Faculty of Kinesiology and <sup>3</sup>Biomedical Engineering Program, University of Calgary, Calgary, Alberta, Canada

<sup>2</sup>Istanbul Technical University, Control and Automation Engineering, Istanbul, Turkey

\*Corresponding author: [osman.darici1@ucalgary.ca](mailto:osman.darici1@ucalgary.ca)

A manuscript submitted for consideration by eLife

1 **ABSTRACT**

2 The simple task of walking up a sidewalk curb is actually a dynamic prediction task. The curb is a disturbance that  
3 causes a loss of momentum, to be anticipated and compensated for. A compensation strategy might regain momen-  
4 tum and ensure undisturbed time of arrival. But there are infinite ways to accomplish this unless there is a selection  
5 criterion. Here we show that humans compensate with an anticipatory pattern of forward speed adjustments, with  
6 a criterion of minimizing mechanical energy input. This is predicted by optimal control for a simple model of walking  
7 dynamics, with each leg's push-off work as input. Optimization predicts a tri-phasic trajectory of speed (and thus  
8 momentum) adjustments, including an anticipatory, feedforward phase. In experiment, human subjects successfully  
9 regain time relative to undisturbed walking, with the predicted tri-phasic trajectory. They also scale the pattern with  
10 up- or down-steps, and inversely with average speed, as also predicted by model. Humans can reason about the  
11 dynamics of walking to plan anticipatory and economical control, even with a sidewalk curb in the way.  
12

## 1 INTRODUCTION

2 There are indeterminate control choices to be made during walking, not least when steady gait is interrupted by a  
3 surface perturbation such as a sidewalk curb. One solution is to do nothing until gait has actually been disrupted,  
4 and to rely on feedback control to restore stasis, similar to stabilizing standing balance after a perturbation. But an  
5 alternative possibility is to plan and act ahead with anticipatory, feedforward adjustments. For example, a ball, once  
6 sighted, may be caught by predicting its dynamics and planning and executing an interception course. A sidewalk  
7 curb may similarly be intercepted, albeit with most of the dynamics within the person rather than the object, and  
8 with a less clearly defined objective. This raises the question of what criteria govern the interception, whether by  
9 feedback or feedforward. If an objective advantage could be identified, it might also be sufficient to predict a single,  
10 optimal response. Thus, the seemingly simple task of dealing with an uneven step may yield insight on whether  
11 humans perform predictive, dynamical planning while they walk.

12 Both feedback and feedforward control could contribute to walking. Feedback control is important for balance dur-  
13 ing walking, for example to adjust foot placement in response to perturbations (Bauby and Kuo, 2000; O'Connor and  
14 Kuo, 2009; Wang and Srinivasan, 2014). In both standing and walking, feedback could be regarded as a means to  
15 control the body's dynamical *state* (Kuo, 1995; Park et al., 2004). In contrast, feedforward is clearly used to plan the  
16 body's location, for example to negotiate around obstacles or through doorways (Arechavaleta et al.; Brown et al.,  
17 2020). Motion must also be planned, with the help of vision, to step over upcoming obstacles (Patla, 1998), and to  
18 adjust foot placement (Matthis and Fajen, 2013). Thus, feedforward could be considered as planning of the body's  
19 path, but not necessarily its dynamical state. But there may also be advantages to planning state, particularly speed  
20 or momentum. After all, it may help to speed up before jumping over a puddle. Indeed, runners do load the leg  
21 differently just before a drop (Müller et al., 2012), perhaps as a way to regulate momentum. The negotiation of  
22 uneven terrain might therefore benefit from feedforward planning of state. However, there currently lacks a mech-  
23 anistic explanation or prediction for such planning.

24 Any systematic control strategy, regardless if feedforward or feedback, should also be driven by objective criteria to  
25 select among infinite options. An example is metabolic energy economy, which determines the preferred step length  
26 and step width of steady walking, as governed by the pendulum-like dynamics of the legs. Perhaps similar dynamics  
27 and similar economy apply to walking over uneven terrain as well. We previously explored this question with a simple  
28 model of human walking (Kuo, 2002), for the task of negotiating a single uneven step (termed Up-step or Down-  
29 step) during otherwise steady walking (Darici et al., 2020). An uncompensated Up-step would normally cause a loss  
30 of momentum, and thus a loss of time compared to walking the same distance uninterrupted. We used optimal  
31 control to determine the most economical strategy to regain lost time and momentum. The objective was to mini-  
32 mize a crude indicator of energy expenditure, the mechanical work performed in the step-to-step transition from  
33 one pendulum-like stance leg to the next (Donelan et al., 2002; Kuo et al., 2005). This yielded a strategy for negoti-  
34 ating an Up-step by modulating forward momentum over multiple steps, starting with a speed-up before the per-  
35 turbation, and continuing the modulation for several steps after the perturbation. The model predicted a substantial  
36 economic advantage to the anticipatory speed-up, compared to post-hoc compensation alone. The optimal control  
37 was highly systematic, with an almost opposite strategy for negotiating a Down-step. This suggests that humans  
38 might also gain advantage from a feedforward, anticipatory strategy, which could allow a perturbation to be nego-  
39 tiated with no loss of time and good economy.

40 The criteria by which humans compensate for ground perturbations is unknown, as is whether they use feedforward  
41 or feedback. And even if energy expenditure were a concern, it might have minor import relative to other conceiva-  
42 ble criteria. It is also quite possible that humans do not care about minor perturbations, and simply lose momentum  
43 to an Up-step. And even if momentum were regained through feedback control, they might still lose considerable  
44 time to the perturbation. We therefore sought to determine whether humans regulate their momentum, whether  
45 they can also regain lost time, and whether they use feedforward control in their compensatory strategy. The pre-  
46 sent study was therefore to experimentally test whether humans optimally compensate for a perturbation to step  
47 height and determine how that compensation is performed.

51

a. Walking over an Up-step

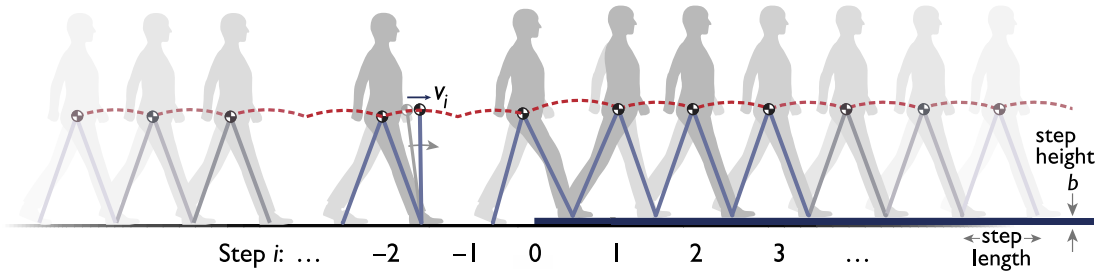

b. Model

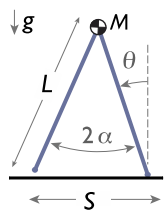

c. Level nominal

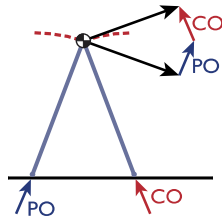

d. Up-step

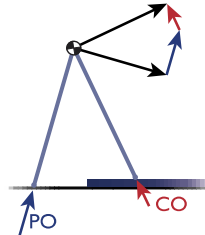

e. Down-step

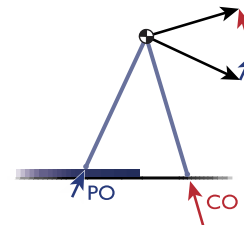

**Figure 1.** Dynamics of walking over a single Up- (or Down-) step. (a) Humans walk with the body center of mass (COM) moving up and down atop the stance leg behaving like an inverted pendulum. Momentum fluctuates in each step (numbered  $i$ ), and is particularly disrupted by an uneven step (at  $i = 0$ ). In experiment, human subjects walked in a walkway (30 m long) with level ground or a single Up- or Down-step (height  $b = 7.5$  cm) at mid-point. Subjects were asked to walk this distance in roughly similar time, regardless of the perturbation, and without receiving feedback about time. Outcomes were quantified by the trajectory of speed fluctuations  $v_i$  at the discrete mid-stance instance (for 15 steps). (b) Dynamic walking model has a point mass  $M$  at pelvis, supported by an inverted pendulum stance leg (massless, length  $L$ , gravitational acceleration  $g$ , fixed step length  $S$ , fixed inter-leg angle  $2\alpha$ ). (c) Level nominal walking has step-to-step transition where COM velocity (dark arrow) is redirected from forward-and-downward to forward-and-upward by an active, impulsive trailing leg push-off (PO), immediately before an inelastic, impulsive, leading leg collision (CO). Both PO and CO are directed along the corresponding leg. (d, e) The model walks Up or Down a step by modulating the sequence of push-offs surrounding and including the uneven step.

**METHODS**

*Model of walking*

We summarize predictions from an optimal control model of walking (Fig. 1; Darici et al., 2020), with details in Appendix. The task is to walk down a walkway interrupted by a single Up- or Down-step (numbered step  $i = 0$ ; Fig. 1a), with adjustments to the forward speed  $v_i$  of each step. The model has rigid, pendulum-like legs supporting a point-mass pelvis of mass  $M$  (Fig. 1b; Kuo, 2002). The dynamics of the single stance phase are those of a simple inverted pendulum, which conserves mechanical energy and therefore loses speed stepping on an Up-step. As a simplification, the previous model's (Kuo, 2002) swing phase dynamics are ignored, and the legs are constrained to fixed step lengths, similar to the "rimless wheel" model (McGeer, 1990). A level, nominal step (Fig. 1c) is punctuated by a step-to-step transition, where the trailing leg pushes off (PO) impulsively just before the leading leg's dissipative collision (CO) impulse. This redirects the center-of-mass (COM) velocity to a new pendular arc described by the leading leg. The push-off and collision impulses are performed along the axis of the corresponding legs, with push-off as the only powered actuation, and (perfectly inelastic) collision the only dissipation. Experiments show that it explains how mechanical work and human metabolic energy expenditure increase as a function of step length (Donelan et al., 2002) or step width (in 3D model; Donelan et al., 2001) on level ground. Here we modeled uneven terrain as a small,

1 vertical height discrepancy  $b$  in step height, where additional push-off can help compensate for momentum lost to  
 2 an Up-step (Fig. 1d), and collision for momentum gained to a Down-step (Fig. 1e).  
 3

4 We formulated an optimal control problem for compensating for a single step height change (Darici et al., 2020).  
 5 The objective was to minimize total push off work for multiple ( $N$  compensatory) steps while compensating for the  
 6 terrain unevenness. The model was governed by the walking dynamics and constrained to start and end its compen-  
 7 sation at steady, nominal speed, with the  $N$  steps distributed equally before and after the Up-step. It was also con-  
 8 strained to match the total time for nominal level, steady walking, thus making up for time lost to the Up-step. The  
 9 decision variables were the push-off work  $u_i$  for each step (where  $i = 0$  for the push-off onto the Up-step), causing  
 10 changes in the forward speed  $v_i$  of each step, discretely sampled at the mid-stance instance when the stance leg  
 11 passed through vertical, prior to the step-to-step transition. The control policy refers to the push-off sequence  $u_i$   
 12 (including  $i$  over a range of steps), or equivalently the sequence of speeds  $v_i$ .

13 **Model Predictions**

14 Our model predicted that there is considerable advantage of anticipation (Fig. 2). Considerable momentum and time  
 15 are lost to an uncompensated Up-step (Fig. 2a). In contrast, the optimal policy is to speed up in advance of the Up-  
 16 step (thereby reducing the loss of momentum and time atop it), and then regain momentum afterwards (Fig. 2b;  
 17 Darici et al., 2020). For stepping down Fig. 2c), the optimal policy is almost exactly the opposite: slow down in ad-  
 18 vance, gain speed and time atop the Down-step, and then slow down again toward nominal speed. These strategies  
 19 are executed through modulation in push-of work (Fig. 2d), with a peak in work when stepping onto the Up-step  
 20 (and a minimum for Down-step). As a result, time (Fig. 2e) is first gained prior to the Up-step (and lost prior to Down-  
 21 step), such that the cumulative time gain eventually reaches zero.  
 22  
 23

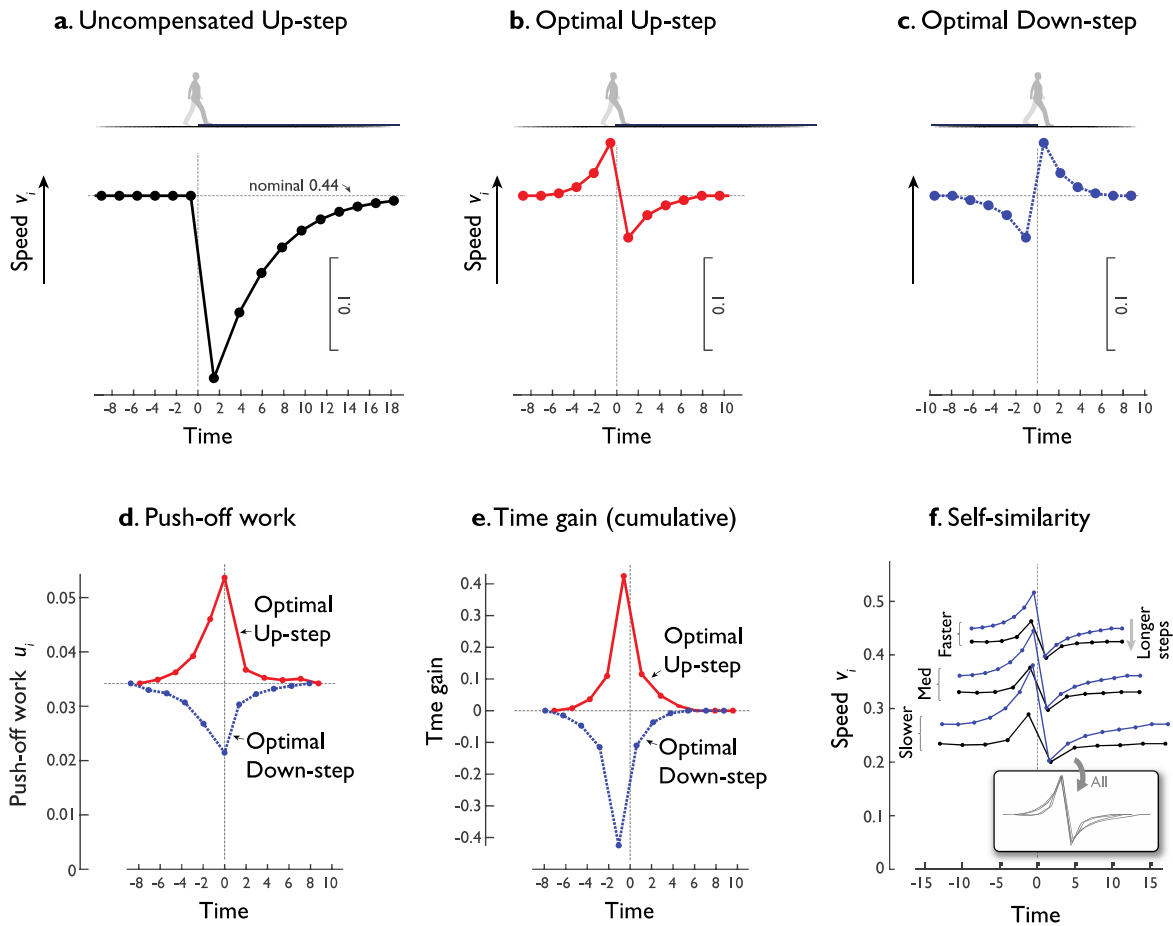

24

1 **Figure 2.** Model predictions for walking over an Up-step or Down-step. **(a)** Walking speed fluctuations vs. time, for  
2 level walking interrupted by a single Up-step (at time 0 and step  $i = 0$ ) with no compensation (constant push-off),  
3 resulting in loss of momentum and time. Speeds  $v_i$  are sampled at mid-stance of each step (prior to step-to-step  
4 transition), and denoted by filled symbols. **(b)** Speed fluctuations for optimal Up-step compensation that minimizes  
5 push-off work. Model anticipates the perturbation with feedforward adjustment to speed up ahead of time, then  
6 loses momentum atop the perturbation, and then regains speed thereafter. **(c)** Speed fluctuations for optimal Down-  
7 step compensation (blue symbols) is nearly opposite in sign to the Up-step compensation (red): Slow down in ad-  
8 vance, gain momentum, then slow down again. **(d)** Optimal control inputs are sequence of push-off work, shown for  
9 Up- and Down-step. Up-step requires more work, and Down-step less work, to walk same distance in same time. **(e)**  
10 Cumulative time gained for Up- and Down-step compensations. **(f.)** Self-similarity of Up-step compensations for  
11 three different nominal speeds and two different step lengths. All trajectories (see inset) are also scaled and super-  
12 imposed to illustrate self-similarity. For model predictions, conditions are similar to a human walking at 1.5 m/s with  
13 a 7.5 cm Up-step (nominal mid-stance velocity  $V = 0.44g^{-0.5}L^{0.5}$ ,  $S = 0.79L$ ,  $b = 0.075L$ ); described in detail by  
14 Darici et al. (2020).

15  
16 An interesting feature of the optimal policy is self-similarity with respect to overall walking speed and step length  
17 (Fig. 2e). The pattern remains almost the same, only scaling in amplitude and time for different overall walking  
18 speeds or step lengths. The amplitude of speed fluctuations also scales inversely with speed, meaning slightly smaller  
19 fluctuations for faster speeds. This is because a step of fixed height (and thus gravitational potential energy) has a  
20 relatively smaller effect on the greater momentum (and thus kinetic energy) of faster walking. In addition, the timing  
21 scales such that the optimal strategy would be elongated in time with shorter step lengths, but in about the same  
22 number of steps. Thus, we expect similar fluctuation patterns regardless of an individual's self-selected speed and  
23 step length, and slightly smaller fluctuations for faster overall speeds.

#### 24 *Experiment*

25 We measured speed fluctuations as humans walked down a level walkway (about 30 m) with a single, raised step  
26 onto a second level of 7.5 cm (Fig. 1A). The subjects were healthy adult subjects (N = 12; 7 male, 5 female, all under  
27 30 yrs age), whose steps and walking speed were measured with inertial measurement units (IMUs) on both feet.  
28 There were three conditions: Up-step, Down-step, and Control on level ground. Both Up- and Down-step used the  
29 same walkway except in opposite directions, and Control took place on level floor directly alongside the walkway.  
30 The raised section, commencing about halfway down, was assembled from fairly rigid, polystyrene insulation foam.  
31 In all conditions, subjects walked at comfortable speed from a start line through and past a finish line. Trials took  
32 place in alternating direction, with a brief delay for the subject to turn around and stand briefly before starting the  
33 next trial. There were at least five (and up to eight) trials of each condition, usually with Up- and Down-step alter-  
34 nating with each other, except with occasional Control conditions inserted at random and interrupting that pattern.  
35 Before data collection, subjects were given opportunity to try the conditions and gain familiarity with the walkway  
36 and the location of the Up-step. For brevity, all mentions of the Up-step apply equally to the Down-step, unless  
37 explicitly stated.

38  
39 The experiment was minimally governed, aside from instructing subjects which conditions to perform. To establish  
40 a subjective "normal" walking speed, and walking time, subjects first performed two to four Control trials at the  
41 beginning of the experiment. They were then encouraged to walk in roughly similar time throughout the experiment.  
42 But they were never received feedback of their timing, even though such data were recorded by stopwatch. This  
43 was in part to mimic the unconstrained nature of daily living, and because the model's predictions do not depend  
44 on a particular speed. We thus expected a range of speeds across trials and across subjects. To help subjects to step  
45 onto the Up-step without stutter steps, there was a visual cue (a paper sticker) on the floor, approximately 5 m from  
46 the Up-step. Subjects were informed that they could use this cue to line up their steps for the Up-step, although  
47 they were not required to use it, and no trials were excluded even if there was a stutter step. Anecdotally, most  
48 subjects appeared to pay little attention to the sticker, especially after the first few trials.

49  
50 We measured walking speed trajectories with Inertial Measurement Units (IMUs) on each foot (Rebula et al., 2013).  
51 Each foot's trajectory was determined by integrating inertial data, subject to an assumption that each foot comes

1 briefly to rest at each footfall, approximately in the middle of stance. We estimated stride length and time from the  
2 forward distance and time between an IMU's footfalls, respectively. Each foot's speed was sampled discretely at  
3 each footfall instant as stride length divided by stride time. Individual distances traveled by the two feet were cor-  
4 rected for integration drift so that they both agreed on overall distance, using linear de-trending. Walking speed was  
5 estimated from the interlaced data from the two feet, in a discrete sequence termed IMU speed, with each sample  
6 assigned to the preceding mid-stance instance. To focus on speed fluctuations, data were analyzed for a central, 8.5  
7 m segment of the walkway, or about 15 steps surrounding the Up-step. To compare between trials, the time  $t = 0$   
8 was defined as the instant of the footfall onto the Up-step (or Down-step, or step next to it for Control). This yielded  
9 a trajectory of walking speed for each trial. Each subject's trials within a condition were averaged at discrete step  
10 numbers, as were the times for those steps, to yield an individual's average trajectory per condition. These trajec-  
11 tories were compared against the average trajectory for all individuals with a Pearson correlation coefficient  $\rho$ , as a  
12 measure of self-similarity. As a test of the model, they were also correlated against the model's predicted trajec-  
13 tories. Finally, a linear regression was performed to test for fluctuation amplitudes scaling negatively with walking  
14 speed, as predicted by the model.

## 15 Results

16 We first examine overall walking speeds, as a basis for comparing speed fluctuations. For the central segment of the  
17 walkway, the overall average self-selected speed was 1.38 m/s on level ground ( $\pm 0.10$  m/s s.d. across subjects). Each  
18 individual typically had a small amount of variation in self-selected speed between trials, with about 5% c.v., coeffi-  
19 cient of variation across control trials. Subjects were thus fairly consistent in their own walking speed, despite re-  
20 ceiving no feedback regarding walking durations or speeds.

21  
22 We next examine fluctuations in speed within each trial of level Control walking (Fig. 3, top row). The speed fluctu-  
23 ations were small in magnitude and noise-like, with variability  $0.031 \pm 0.007$  m/s (root-mean-square variation within  
24 trial, reported as mean  $\pm$  s.d. across subjects), or about 2.2% c.v. These fluctuations exhibited a small amount of  
25 systematic behavior, as demonstrated by correlating each individual's average Control trial against the average Con-  
26 trol across all subjects. The correlation  $\rho$  was  $0.47 \pm 0.31$  ( $P = 2.5e-04$ ), suggesting a degree of non-random system-  
27 aticity between subjects, albeit of small amplitude within the 2.2% fluctuations.

### 28 1. *Humans compensated for Up- and Down-steps to conserve walking duration*

29 Subjects walked at similar overall speeds whether or not there was an uneven step (see Table 1). There were no  
30 significant differences in overall speed, step length, or segment duration due to condition (all  $P > 0.05$ , repeated  
31 measures ANOVA). Speeds were also fairly consistent across trials within Up- or Down-step conditions (2 – 3% c.v.).  
32 This compensation contrasts with what would be expected for a no-compensation strategy. The model, if performing  
33 constant push-offs instead of compensating, would lose about 1 s on the Up-step compared to the Down-step (Fig.  
34 2a), compared to level walking. Alternatively, a particle sliding on frictionless ground at human-like speed, would be  
35 expected to lose about 0.7 m/s and 8 s to an upward ramp of equivalent height. Thus, both a walking model and a  
36 sliding particle lose substantial speed and time due to a change in height, if not for some form of active compensa-  
37 tion. In contrast, human subjects maintained almost the same walking speed and duration, as expected of successful  
38 compensation for an Up- or Down-step.

### 40 2. *Up- and Down-step compensatory speed fluctuations were systematic and self-similar*

41 There was also a clear pattern in compensations for an uneven step, with consistent fluctuations in walking speed  
42 (Fig. 3). The fluctuations within these trials were greater than those of Control, about 3.0% and 3.4% c.v. for Up- and  
43 Down-steps (Fig. 3 middle and bottom), respectively. The compensation strategies, in terms of walking speed trajec-  
44 tory over time, appeared qualitatively similar between multiple trials for an individual (Fig. 3 left column), and be-  
45 tween different individuals (Fig. 3 middle column), to yield a single representative trajectory for all Up-step compen-  
46 sations (Fig. 3 right column).

47  
48 The basic response could be summarized in terms of a triphasic pattern centered about the Up-step: (1) Speed up in  
49 the two steps prior, (2) then lose speed during the two steps onto the Up-step and immediately thereafter, and (3)

1 then regain speed over the following one or two steps. The peak speed just prior to the Up-step ( $i = -1$ ) was about  
2 5.7% greater than average speed, and the minimum after the Up-step ( $i = 1$ ) was about 3.4% slower. Similar obser-  
3 vations were the case for Down-step compensations (Fig. 3 bottom row), except that fluctuations were in nearly the  
4 opposite direction, with a basic pattern of slow down, speed up, slow down. The timing was slightly different, with  
5 the initial slow-down being clearest for only one step immediately before the Down-step ( $i = -1$ ), then speed-up  
6 occurring for about three steps, and the return to normal walking in only about one step.

7  
8 The systematic behavior was quantified as follows. The Up-step and Down-step conditions were either not corre-  
9 lated or very weakly correlated with Control ( $\rho = -0.016 \pm 0.21$  and  $0.184 \pm 0.193$ , respectively, correlating each  
10 subject against Control average across subjects,  $P = 0.78$ ,  $P = 0.007$ ). But the patterns were similar between each  
11 individual's Up-steps, with a positive correlation coefficient between Up-step trials ( $\rho = 0.82 \pm 0.1252$ ; correlating  
12 each subject against Up-step average across subjects,  $P = 1.26e-10$  paired t-test of correlations). The same was true  
13 for Down-step patterns, with positive correlation ( $\rho = 0.68 \pm 0.27$ ,  $P = 3.0e-06$ ). Moreover, the two fluctuations for  
14 the two conditions were somewhat opposite to each other, with a negative correlation between individual Up-steps  
15 and average Down-step pattern and vice versa (respectively  $\rho = -0.34 \pm 0.16$ ,  $P = 1.6e-05$ ;  $\rho = -0.27 \pm 0.22$ ,  $P =$   
16  $0.0016$ ).

17  
18



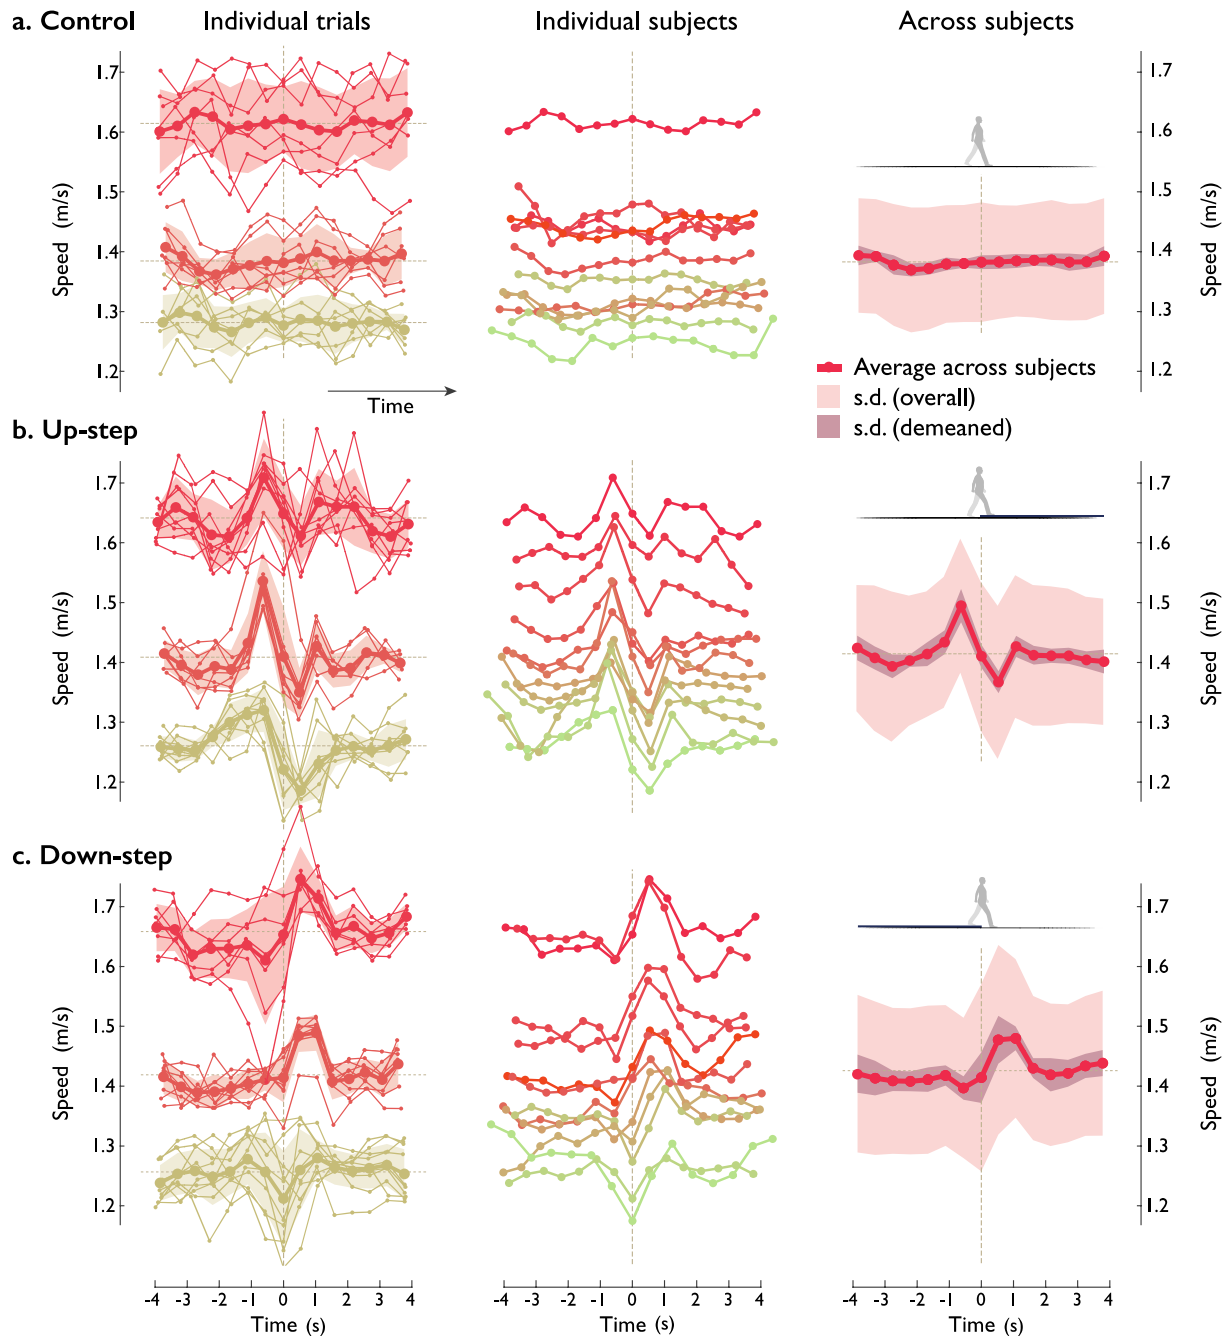

1  
2 **Figure 3.** Human walking speed trajectories vs. time, for (A.) Control and (B.) Up- and (C.) Down-step conditions.  
3 Plots are arranged in columns: (left:) All individual trials of three representative test subjects (thin lines connecting  
4 small dots), along with per-subject average trajectories (across trials, thick lines) and standard deviations (shaded  
5 regions  $\pm 1$  s.d.; dashed line indicates average speed). (Middle:) Speed fluctuations of each test subject (N = 12, indi-  
6 vidual colors) walking over the step, averaging all trials within each subject. (Right:) Average speed trajectories across  
7 all test subjects (solid line), with standard deviation across all subjects (light shaded region), and standard deviation  
8 ignoring subject-dependent speed (darker shaded region). Speed is defined as step length divided by step time,  
9 assigned to the middle-stance instant of each step (indicated by dot symbols). All trials are aligned to zero time,  
10 defined as middle-stance instant after landing on the Up- or Down-step (both 7.5 cm high).  
11  
12

1           3. *Step lengths and times also fluctuated*

2 Step lengths and times also appeared to have fluctuation patterns (Fig. 4), reported descriptively here. For Up-steps  
3 (Fig. 4 left/top row), step lengths were about +3.1%, +18.5%, and -7% for the three steps surrounding the perturba-  
4 tion ( $i = -1, 0, +1$ ), respectively, compared to overall walking speed. For Down-steps, the corresponding step length  
5 differences were .24% 2.29% -2.58% (Fig. 4 bottom row). As for step times (Fig. 4 bottom), the Up-step difference-  
6 swere-5.8%, +15%, -2.7%, and Down-steps differences were +2.5%, +2.5%, and -3.5%, compared to average step  
7 period. No statistical tests were performed, as the model made no specific predictions about these fluctuations.  
8

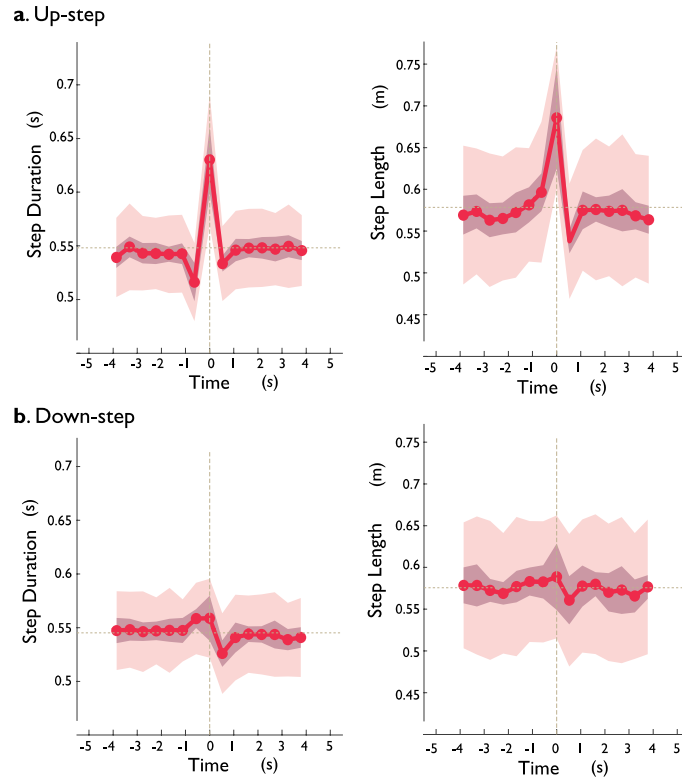

9  
10 **Figure 4.** Human (left column:) step time and (right column:) step length fluctuations versus time, for (a.) Up-step  
11 and (b.) Down-step. Shown are step times and step lengths for each step (line denotes mean across subjects, shaded  
12 area denotes  $\pm 1$  s.d.;  $N = 12$ ) vs. time, with vertical line denoting the step onto the perturbation.  
13

#### 4. Optimization model predicts humans walking speed compensations

The human compensation strategies agreed reasonably well against model predictions (Fig. 5a, b for model; c, d for human). Both exhibited a general response of speeding up before the Up-step, then slowing down on and after, and finally regaining speed toward nominal speed. Down-step responses also agreed, with approximately opposite pattern to Up-step. This agreement was quantified by a positive correlation coefficient between human and model fluctuations for both Up-steps and Down-steps ( $\rho = 0.50 \pm 0.21$  and  $0.59 \pm 0.17$ , respectively, both  $P < 0.05$ ). And in keeping with the model's prediction of opposing fluctuations for Up- vs. Down-steps, there was also a negative correlation between human Up-steps and model Down-steps, and vice-versa ( $\rho = -0.42 \pm 0.21$  and  $-0.54 \pm 0.15$ , respectively; both  $P < 0.05$ ). We also verified that human control responses were not correlated with model predictions for either Up- or Down-steps, with correlation coefficients not significantly different from zero (both  $P > 0.05$ ).

Human responses also exhibited negative scaling with respect to walking speed, as predicted by model. A linear regression of normalized speed fluctuation amplitudes vs. overall speed revealed a negative coefficient ( $-1.64 \pm 0.58 \text{ s/m}^2$ , mean  $\pm$  c.i.,  $P = 2.6\text{e-}12$ ), meaning that a 1 m/s increment in overall speed was accompanied by an approximately 12.3% reduction in fluctuation magnitude for a 7.5 cm step.

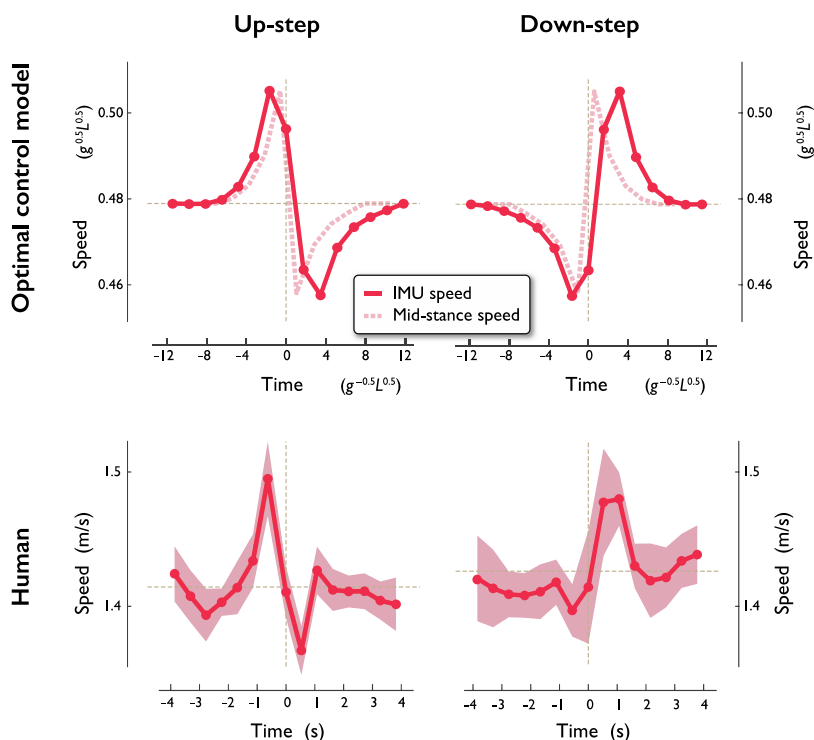

**Figure 5.** Comparison of model and human walking speed fluctuations vs. time, compensating for (left column:) Up- and (right column:) Down-steps. (Top row:) Model speed fluctuations predicted to minimize push-off mechanical work (Bottom row:) Experimentally measured compensation strategies for humans ( $N = 12$ ), showing average speed pattern across subjects (shaded regions denote  $\pm 1$  s.d. after eliminating variations in average speed). Each data point corresponds to speed measured by inertial measurement unit (IMU speed), defined as step distance divided by step time, and assigned to the instance when the stance leg is upright. The first step onto the Up- or Down-step is indicated by vertical dashed line, also at middle stance instant. The average walking speed is denoted by horizontal solid line. Model trajectories are converted from mid-stance speed for simulation into the equivalent experimental IMU speed, plotted in dimensionless speed and time, equivalent to units of  $\sqrt{gL} = 3.13 \text{ m/s}$  and  $\sqrt{L/g} = 0.32 \text{ s}$ , respectively (using gravitational acceleration  $g$  and human leg length  $L = 1 \text{ m}$ ).

## Discussion

We examined how humans anticipate and compensate for a step change in the height of an otherwise flat walking surface. The compensatory response was characterized by a systematic, tri-phasic pattern in walking speed fluctuations, from which we draw three notable observations. First, the response exhibited self-similarity, in that the same basic pattern could describe behavior at a variety of average walking speeds and step lengths. Second, the response also exhibited an anticipatory component, meaning that it partially occurred prior to physically encountering the

1 step. Finally, the response was consistent with predictions from a simple walking model, optimizing for least me-  
2 chanical work. We next discuss these findings with regard to implications for feedforward human control.

3  
4 Human speed fluctuations were quite systematic. They exhibited a similar basic pattern across different trials of an  
5 individual, across different individuals, and at a variety of average walking speeds and step lengths (Figs. 3 & 4). Part  
6 of the systematicity could be attributed to dynamics, with a pendulum-like exchange of speed for height atop the  
7 Up-step ( $i = 0$ , Fig. 3), along with a loss of time (Fig. 4). But some of the systematicity is attributable to active control,  
8 because speed was then quickly regained toward nominal, considerably faster than expected if there were no active  
9 compensation (Fig. 2a; see also Darici et al., 2020). And more telling was the speed-up prior to the perturbation,  
10 which cannot be attributed to a feedback response to perturbation, but rather indicates intentional, anticipatory  
11 control. In addition, the speed fluctuations were lower in amplitude for higher speeds, as predicted for step-to-step  
12 transition dynamics. The compensatory strategies therefore reflect pendulum-like dynamics, and systematic, central  
13 nervous system control with feedback and feedforward (anticipatory) components.

14  
15 The result of this active control was successful compensation for time lost to the perturbation. Overall walking du-  
16 ration was conserved across experimental conditions, demonstrating an ability to correct for uneven terrain. This  
17 cannot be explained by post hoc, feedback regulation of instantaneous speed, which would restore nominal speed  
18 but with a loss (gain) of time from the Up-step (Down-step). Nor can it be explained by learned adaptation during  
19 the experiment, because subjects never received feedback about their walking duration, and were only loosely ad-  
20 vised to keep that time consistent. The control, particularly the anticipatory component, instead appears to be based  
21 on prior knowledge or experience. In daily living, humans regularly make decisions regarding walking route and  
22 speed, and seem able to estimate what path may take less time or effort. They may accumulate considerable expe-  
23 rience, perhaps equivalent to an internal model of walking dynamics, sufficient to plan anticipatory compensations.  
24 Learning and anticipatory planning have mainly been addressed by the separate field of neuromotor control, which  
25 has theorized that upper extremity reaching movements are planned with CNS internal models of dynamics, and  
26 driven by an objective of movement accuracy (Franklin et al., 2008; Sharp et al., 2011). The present study borrows  
27 from that approach in its use of dynamical modeling and optimal control computations.

28  
29 This compensatory strategy is consistent with a simple, optimal control model of walking. There are infinite ways to  
30 walk over an up-step perturbation without suffering a loss of time. But minimization of work for step-to-step transi-  
31 tions predicts the particular triphasic pattern observed here. A small (7.5 cm high) step might seem too trivial to  
32 compensate for, but our model suggests that considerable time could be lost (Darici et al., 2018), and substantial  
33 energy lost without anticipation (Darici et al., 2020). Humans seem well able to gauge a relatively small surface  
34 irregularity, plan a dynamical course of action, and then execute that plan for several steps before and after the  
35 perturbation. They appear capable of reasoning about the dynamics of walking.

36  
37 This raises the question how the control is implemented by the central nervous system. The human's ability to reason  
38 about surface perturbations could be regarded as equivalent to performing optimal control with an internal model  
39 of walking dynamics. But its neural representation need not resemble optimal control. For example, reinforcement  
40 learning suggests that an objective function such as ours could be optimized iteratively, and expressed as a function  
41 of body state and terrain, starting from a visual terrain image as input (Heess et al., 2017). The resulting control  
42 policy is a mapping from vision and state to action, which might be considered an inverse internal model of dynamics  
43 (Kawato, 1999). Our results raise the possibility that such a mapping could be simple and scalable. A single Up-step  
44 response could be learned, and then merely scaled in amplitude for other walking speeds or step heights, due to the  
45 systematic nature of the dynamics. Thus, the control policy might be stored in quite compact form, a possibility  
46 raised but yet to be tested. Also needed for learning is a means to evaluate the objective cost function. Our cost of  
47 mechanical work could be evaluated by body somatosensors, but information might also be gained from physiolog-  
48 ical sensors of metabolic cost. In fact, the work of step-to-step transitions exacts an approximately proportional  
49 metabolic cost in steady state walking (Adamczyk et al., 2006; Donelan et al., 2001; Donelan et al., 2002; Kuo et al.,  
50 2005). It remains to be tested whether the same holds true for the transient conditions examined here, but meta-  
51 bolic energy is compelling for its physiological relevance and importance for animal life (Alexander, 1996). Thus, the  
52 optimal compensation could be learned from feedback of physiologically relevant information.

53

1 This study highlights a less-appreciated aspect of vision-based path planning. It is clear that humans use vision to  
2 plan paths for the body (Arechavaleta et al.; Brown et al., 2020), including adjustment of COM height (Müller et al.,  
3 2012) and foot placement (Matthis and Fajen, 2013; Patla, 1998). But we found that humans plan not just positions,  
4 but also momentum. They make quick, dynamically sensible decisions to overcome quite minor obstacles, appar-  
5 ently for energetic benefit. Such planning might also explain the leg loading preceding a Down-step in human running  
6 (Müller et al., 2012). It is also consistent with how birds run over an obstacle, with an anticipatory vault in the step  
7 beforehand ( $i = -1$ ), perhaps for economy (Birn-Jeffery et al., 2014). Path planning may therefore be for more than  
8 just body location, but also dynamical state, and for the purpose of energy economy.

9  
10 The present model has a number of limitations. One is that Down-step responses were predicted less well than Up-  
11 steps (Fig. 5). We suspect that the inverted pendulum analogy is less predictive for stepping down, when humans  
12 may allow the trailing knee to flex, perhaps to reduce the rate of fall. Our model might be improved by inclusion of  
13 a knee (e.g., Dean and Kuo, 2009) and feet (Zelik et al., 2014), which would better reflect the fore-aft asymmetries  
14 of the human, active lifting of the foot when needed (Wu and Kuo, 2016), and perhaps predict the asymmetries  
15 observed in Up- vs. Down-steps. We also modeled only fixed step lengths, but inclusion of variable step lengths or  
16 foot placements (Bhounsule, 2014; Kuo, 2001; Ojeda et al., 2015) might help to predict the variations in step length  
17 observed experimentally (Fig. 4). It is also possible that humans couple their sagittal and frontal plane motions for a  
18 change in step height, which might be accommodated in a three-dimensional model (Kim and Collins, 2017; Kuo,  
19 1999). Additional degrees of freedom might help to predict the multi-joint actions of humans, given hypotheses  
20 regarding the attendant costs. As a simplification, we also examined only single terrain disturbances. But we consider  
21 it relatively straightforward to predict and test compensation strategies for more complex terrain disturbances over  
22 multiple steps. Fortunately, the dynamical modeling approach is amenable to inclusion of more degrees of freedom,  
23 and to more rigorous experimental testing.

24  
25 Another limitation was that the human speed fluctuations were simply noisy. There was significant variability be-  
26 tween trials of a single individual and between different individuals. This was due in part to the relatively small step  
27 height perturbations, which resulted in relatively small speed fluctuations compared to the noisy intrinsic variability  
28 of humans. We intentionally selected small perturbations to remain within the realm of pendulum-like walking. We  
29 would expect relatively less noise with larger step height changes, which would likely necessitate more human-like  
30 features in the model, such as the knees mentioned above.

31  
32 Despite these limitations, we showed here that humans perform anticipatory speed adjustments on uneven terrain.  
33 A simple model minimizing the mechanical work of step-to-step transitions can predict these adjustments. The ad-  
34 justments start several steps before, extend after the perturbation, in a tri-phasic pattern of speed fluctuations. Such  
35 a pattern is consistent with metabolic energy expenditure as a criterion for optimal control and shows that humans  
36 perform feedforward control before a perturbation is directly encountered. The central nervous system appears to  
37 anticipate the effects of disturbances on the dynamics of the body and exploit these dynamics for active and eco-  
38 nomical control.

### 39 **Acknowledgements**

40 This work is supported by NSF DGE 0718128, the ONR ETOWL program, NIH AG030815, the Dr. Benno Nigg  
41 Research Chair (University of Calgary), and NSERC (Natural Sciences and Engineering Research Council of  
42 Canada) Discovery program and Canada Research Chair (Tier 1) program.

### 43 **Competing interests**

44 The authors declare no competing interests.

## 1 Appendix

### 2 *Dynamic walking model*

3 The model dynamics are briefly summarized as follows (detailed previously by Darici et al., 2018). Each of  $N$  steps  
 4 has index  $i$  with the Up- or Down-step disturbance located at  $i = 0$  (Fig. 1c). Negative  $i$  therefore refer to the pre-  
 5 paratory steps beforehand, and positive to recovery steps thereafter. Each step has a pendulum-like single stance  
 6 phase with passive dynamics, and a costly step-to-step transition. Mechanical work is only performed during that  
 7 transition, starting with COM velocity  $v_i^-$  directed forward and downward at the end of each stance phase. For  
 8 brevity, the equations presented here use dimensionless versions of quantities, with  $M$ ,  $g$ , and  $L$  as base units. The  
 9 step-to-step transition starts with pre-emptive push-off work  $u_i$  (in units of mass-normalized work) performed im-  
 10 pulsively along the trailing leg to redirect the COM velocity. This is followed immediately by the heel-strike collision  
 11 along the leading leg, to yield post-collision velocity  $v_i^+$ . Again applying impulse-momentum (Kuo, 2002),  
 12

$$13 \quad v_i^+ = v_i^- \cos 2\alpha + \sqrt{2u_i} \sin 2\alpha . \quad (1)$$

14  
 15 Another single stance phase follows the step-to-step transition, and is modeled as an underactuated, simple inverted  
 16 pendulum. As a discrete indicator of overall forward momentum, we use the mid-stance velocity  $v_i$  (no superscript;  
 17 see Fig. 1) following step-to-step transition  $v_i^-$ , sampled when the leg is vertical and the COM velocity is purely  
 18 forward.  
 19

20 We treat steady, level walking as the nominal condition (Fig. 1c). The nominal push-off work  $u_i$  offsets the collision  
 21 work (Kuo, 2002), so that  
 22

$$23 \quad u_i = \frac{1}{2}(v_i^-)^2 \tan^2 \alpha \quad (2)$$

24  
 25 and  $v_i^+ = v_i^-$ . The uneven step disturbs steady walking (Fig. 1d). Its height  $b$  (positive for up-steps, negative for  
 26 down-steps) causes the preceding stance phase to end with a different stance leg angle from nominal. For a given  
 27 height  $b$  and step length  $S$ , we define the angular disturbance as  $\delta_i$ ,  
 28

$$29 \quad \delta_0 = \sin^{-1} \frac{b}{S}, \delta_i = 0 \text{ for } i \neq 0 , \quad (4)$$

30  
 31 where the angle is zero for all non-disturbance steps.  
 32

33 An inverted pendulum stance phase follows each step-to-step transition. A step time  $\tau_i$  defined as the time for the  
 34 stance leg angle  $\theta$  to move between successive step-to-step transitions, from  $v_i^+$  to  $v_{i+1}^+$  and passing through mid-  
 35 stance speed  $v_i$ .  
 36

37 Using the linearized dynamics, the dimensionless step time  $\tau_i$  of step  $i$  is  
 38

$$39 \quad \tau_i = \log \frac{\alpha - \delta_{i+1} + \sqrt{(v_i^+)^2 - 2\alpha(\delta_i + \delta_{i+1}) + \delta_{i+1}^2 - \delta_i^2}}{v_i^+ - \alpha - \delta_i} . \quad (6)$$

40  
 41 Solving the equation of motion with the step time, the velocity at end of stance  $v_{i+1}^-$ , or equivalently the beginning  
 42 of the next step-to-step transition can be found as:  
 43

$$44 \quad v_{i+1}^- = \frac{1}{2} \left( e^{-\tau_i} (v_i^+ + \alpha + \delta_i) + e^{\tau_i} (v_i^+ - \alpha - \delta_i) \right) . \quad (7)$$

45  
 46  
 47  
 48 Mid-stance time  $\tau_i'$  for step  $i$  can also be found using the linearized dynamics:  
 49

1

$$\tau'_i = \log \left( \frac{\sqrt{(v_i^+)^2 - \alpha^2 - 2\alpha\delta_i - \delta_i^2}}{v_i^+ - \alpha - \delta_i} \right) \quad (8)$$

2

3

4 Solving for mid-stance speed  $v_i$ ,

5

6

$$v_i = \frac{1}{2} \left( e^{-\tau'_i} (v_i^+ + \alpha + \delta_i) + e^{\tau'_i} (v_i^+ - \alpha - \delta_i) \right). \quad (9)$$

7

8

9

10

11

12

13

14

15

16

17

18

19

20

21

### Optimization problem

The optimization is formulated as follows, with policy  $\pi$  denoting the set of push-offs  $u_i$ :

$$\begin{aligned} \pi^* &= \arg \min_{\pi} \sum_{i=-(N-1)/2}^{(N-1)/2} u_i \\ &\text{subject to:} \\ \text{Speed:} & \quad v_{-(N-1)/2} = V, v_{(N-1)/2} = V \\ \text{Time:} & \quad \sum_{i=-(N-1)/2}^{(N-1)/2} \tau_i = T \cdot N \\ \text{Dynamics:} & \quad \text{Model dynamics (above)} \end{aligned}$$

22

23

24

25

26

27

28

29

30

31

32

where  $N$  is the total (odd) number of steps and step  $i = 0$  is the first step on the Up-/Down-step. Thus  $N$  adjusts how far in advance and or after the perturbation for which the model can modulate its momentum or speed. The speed constraints are such that the initial and final conditions are equal to the nominal, steady speed  $V$ . The time constraint makes up for lost time, so that the total time is equal to the nominal time to walk  $N$  steps on level ground. By the end of the control sequence, the model must walk at the same speed as nominal and must have caught up with the nominal model on level ground. We chose  $N$  large enough to cover the speed adjustments that humans made in the experiments. Note that, because human speeds are most conveniently measured from footfall to footfall, we converted the model speeds to a similar footfall definition (stride length divided by stride time, footfall to footfall) for purposes of comparison between model and human (Fig. 5).

## 1   **References**

- 2   **Adamczyk, P. G., Collins, S. H. and Kuo, A. D.** (2006). The advantages of a rolling foot in human walking. *Journal of*  
3         *Experimental Biology* **209**, 3953–3963.
- 4   **Alexander, R. M.** (1996). *Optima for Animals*. Princeton, NJ: Princeton University Press.
- 5   **Arechavaleta, G., Laumond, J., Member, S., Hicheur, H. and Berthoz, A.** An optimality principle governing human  
6         walking. *Robotics, IEEE Transactions on* 1–5.
- 7   **Bauby, C. E. and Kuo, A. D.** (2000). Active control of lateral balance in human walking. *J Biomech* **33**, 1433–1440.
- 8   **Bhounsule, P.** (2014). Control of a compass gait walker based on energy regulation using ankle push-off and foot  
9         placement. *Robotica* **33**, 1–11.
- 10   **Birn-Jeffery, A. V., Hubicki, C. M., Blum, Y., Renjewski, D., Hurst, J. W. and Daley, M. A.** (2014). Don't break a leg:  
11         running birds from quail to ostrich prioritise leg safety and economy on uneven terrain. *Journal of Experi-*  
12         *mental Biology* **217**, 3786–3796.
- 13   **Brown, G. L., Seethapathi, N. and Srinivasan, M.** (2020). Energy optimality predicts curvilinear locomotion.
- 14   **Darici, O., Temeltas, H. and Kuo, A. D.** (2018). Optimal regulation of bipedal walking speed despite an unexpected  
15         bump in the road. *PLOS ONE* **13**, e0204205.
- 16   **Darici, O., Temeltas, H. and Kuo, A. D.** (2020). Anticipatory Control of Momentum for Bipedal Walking on Uneven  
17         Terrain. *Scientific Reports* **10**, 540.
- 18   **Dean, J. C. and Kuo, A. D.** (2009). Elastic coupling of limb joints enables faster bipedal walking. *J R Soc Interface* **6**,  
19         561–573.
- 20   **Donelan, J. M., Kram, R. and Kuo, A. D.** (2001). Mechanical and metabolic determinants of the preferred step width  
21         in human walking. *Proc. Biol. Sci* **268**, 1985–1992.
- 22   **Donelan, J. M., Kram, R. and Kuo, A. D.** (2002). Mechanical work for step-to-step transitions is a major determinant  
23         of the metabolic cost of human walking. *Journal of Experimental Biology* **205**, 3717–27.
- 24   **Franklin, D. W., Burdet, E., Peng Tee, K., Osu, R., Chew, C.-M., Milner, T. E. and Kawato, M.** (2008). CNS Learns  
25         Stable, Accurate, and Efficient Movements Using a Simple Algorithm. *J Neurosci* **28**, 11165–11173.
- 26   **Heess, N., Tb, D., Sriram, S., Lemmon, J., Merel, J., Wayne, G., Tassa, Y., Erez, T., Wang, Z., Eslami, S. M. A., et al.**  
27         (2017). Emergence of Locomotion Behaviours in Rich Environments. *arXiv:1707.02286v2*.
- 28   **Kawato, M.** (1999). Internal models for motor control and trajectory planning. *Current Opinion in Neurobiology* **9**,  
29         718–727.
- 30   **Kim, M. and Collins, S. H.** (2017). Once-Per-Step Control of Ankle Push-Off Work Improves Balance in a Three-Di-  
31         mensional Simulation of Bipedal Walking. *IEEE Transactions on Robotics* **33**, 406–418.
- 32   **Kuo, A. D.** (1995). An optimal control model for analyzing human postural balance. *IEEE Trans Biomed Eng* **42**, 87–  
33         101.
- 34   **Kuo, A. D.** (1999). Stabilization of lateral motion in passive dynamic walking. *International Journal of Robotics Re-*  
35         *search* **18**, 917–930.



- 1 **Kuo, A. D.** (2001). A simple model of bipedal walking predicts the preferred speed-step length relationship. *Journal*  
2 *of Biomechanical Engineering* **123**, 264–9.
- 3 **Kuo, A. D.** (2002). Energetics of actively powered locomotion using the simplest walking model. *Journal of Biome-*  
4 *chanical Engineering* **124**, 113–20.
- 5 **Kuo, A. D., Donelan, J. M. and Ruina, A.** (2005). Energetic consequences of walking like an inverted pendulum: step-  
6 to-step transitions. *Exercise and sport sciences reviews* **33**, 88.
- 7 **Matthis, J. S. and Fajen, B. R.** (2013). Humans exploit the biomechanics of bipedal gait during visually guided walking  
8 over complex terrain. *Proc. Biol. Sci.* **280**, 20130700.
- 9 **McGeer, T.** (1990). Passive dynamic walking. *International Journal of Robotics Research* **9**, 62–82.
- 10 **Müller, R., Ernst, M. and Blickhan, R.** (2012). Leg adjustments during running across visible and camouflaged inci-  
11 dental changes in ground level. *Journal of Experimental Biology* **215**, 3072–3079.
- 12 **O'Connor, S. M. and Kuo, A. D.** (2009). Direction-dependent control of balance during walking and standing. *J. Neu-*  
13 *rophysiol* **102**, 1411–1419.
- 14 **Ojeda, L. V., Rebula, J. R., Kuo, A. D. and Adamczyk, P. G.** (2015). Influence of contextual task constraints on pre-  
15 ferred stride parameters and their variabilities during human walking. *Medical Engineering & Physics* **37**,  
16 929–936.
- 17 **Park, S., Horak, F. B. and Kuo, A. D.** (2004). Postural feedback responses scale with biomechanical constraints in  
18 human standing. *Exp Brain Res* **154**, 417–427.
- 19 **Patla, A. E.** (1998). How is human gait controlled by vision. *Ecological Psychology* **10**, 287–302.
- 20 **Rebula, J. R., Ojeda, L. V., Adamczyk, P. G. and Kuo, A. D.** (2013). Measurement of foot placement and its variability  
21 with inertial sensors. *Gait Posture* **38**, 974–980.
- 22 **Sharp, I., Huang, F. and Patton, J.** (2011). Visual error augmentation enhances learning in three dimensions. *J Neu-*  
23 *roEngineering Rehabil* **8**, 52.
- 24 **Wang, Y. and Srinivasan, M.** (2014). Stepping in the direction of the fall: the next foot placement can be predicted  
25 from current upper body state in steady-state walking. *Biology Letters* **10**, 20140405.
- 26 **Wu, A. R. and Kuo, A. D.** (2016). Determinants of preferred ground clearance during swing phase of human walking.  
27 *Journal of Experimental Biology* jeb.137356.
- 28 **Zelik, K. E., Huang, T.-W. P., Adamczyk, P. G. and Kuo, A. D.** (2014). The role of series ankle elasticity in bipedal  
29 walking. *Journal of Theoretical Biology* **346**, 75–85.

30  
31
